# Supplementary material
Source: HighWire-hosted journal article supplement (https://gut.bmj.com/content/72/3/522)

## Suppl. Figure 1.jpg

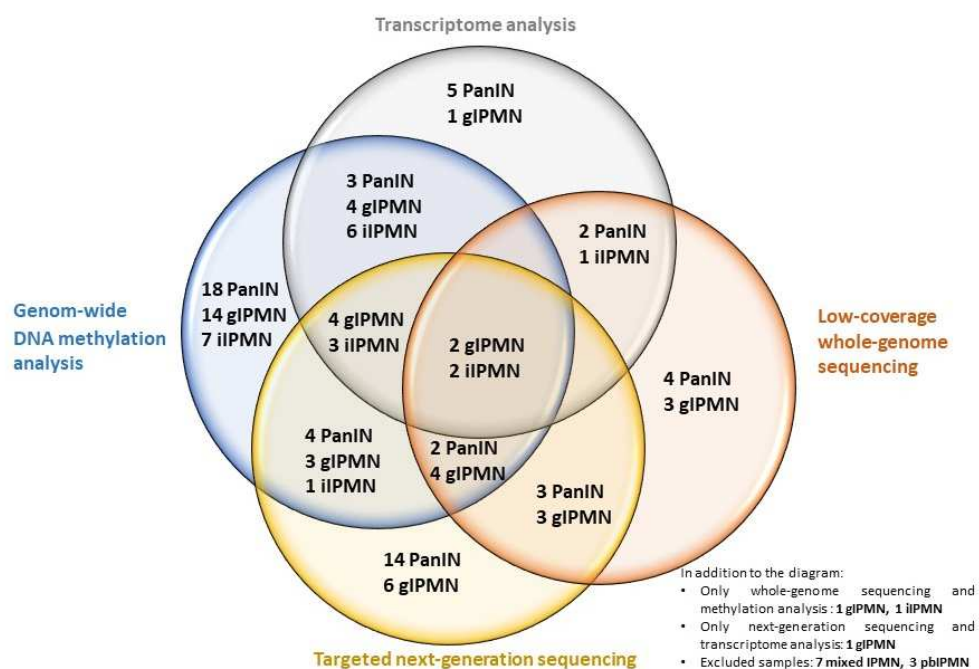

Supplement: inline-supplementary-material-2 [file inline-supplementary-material-2.pdf]

Layer

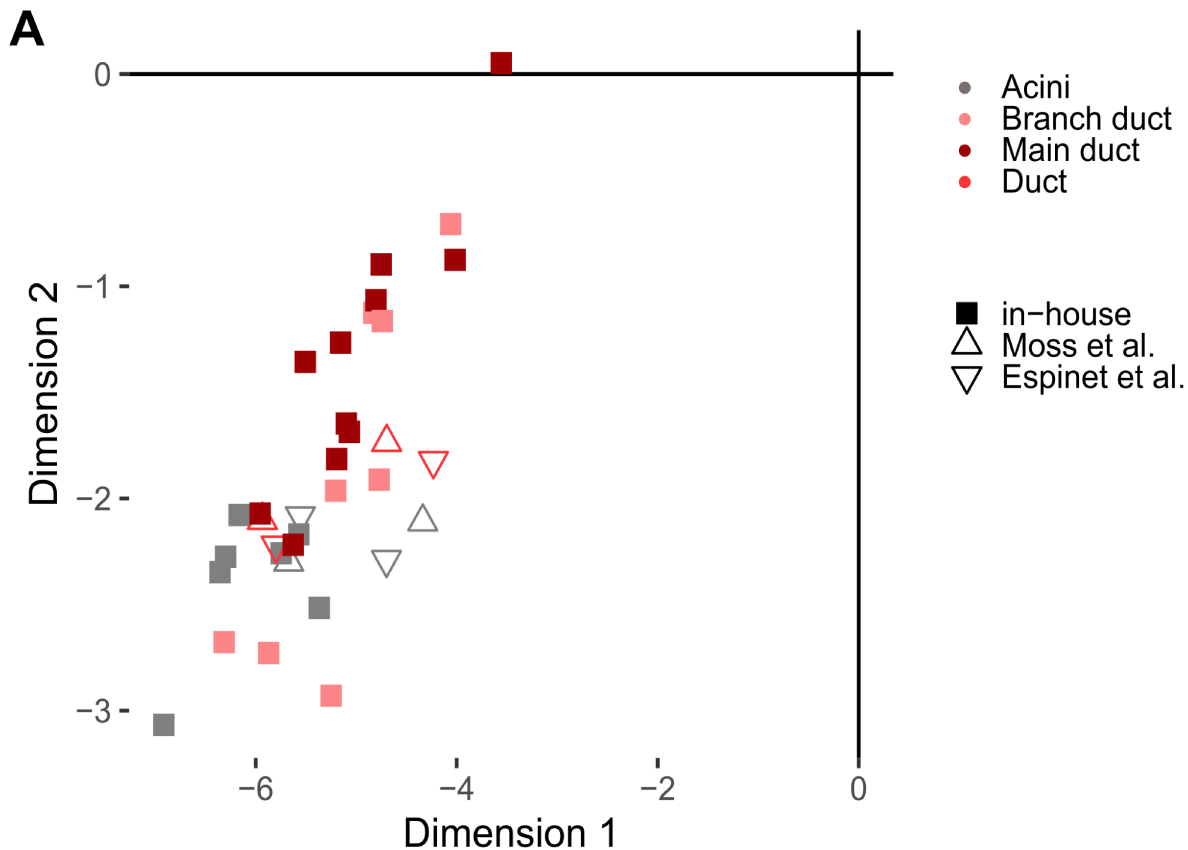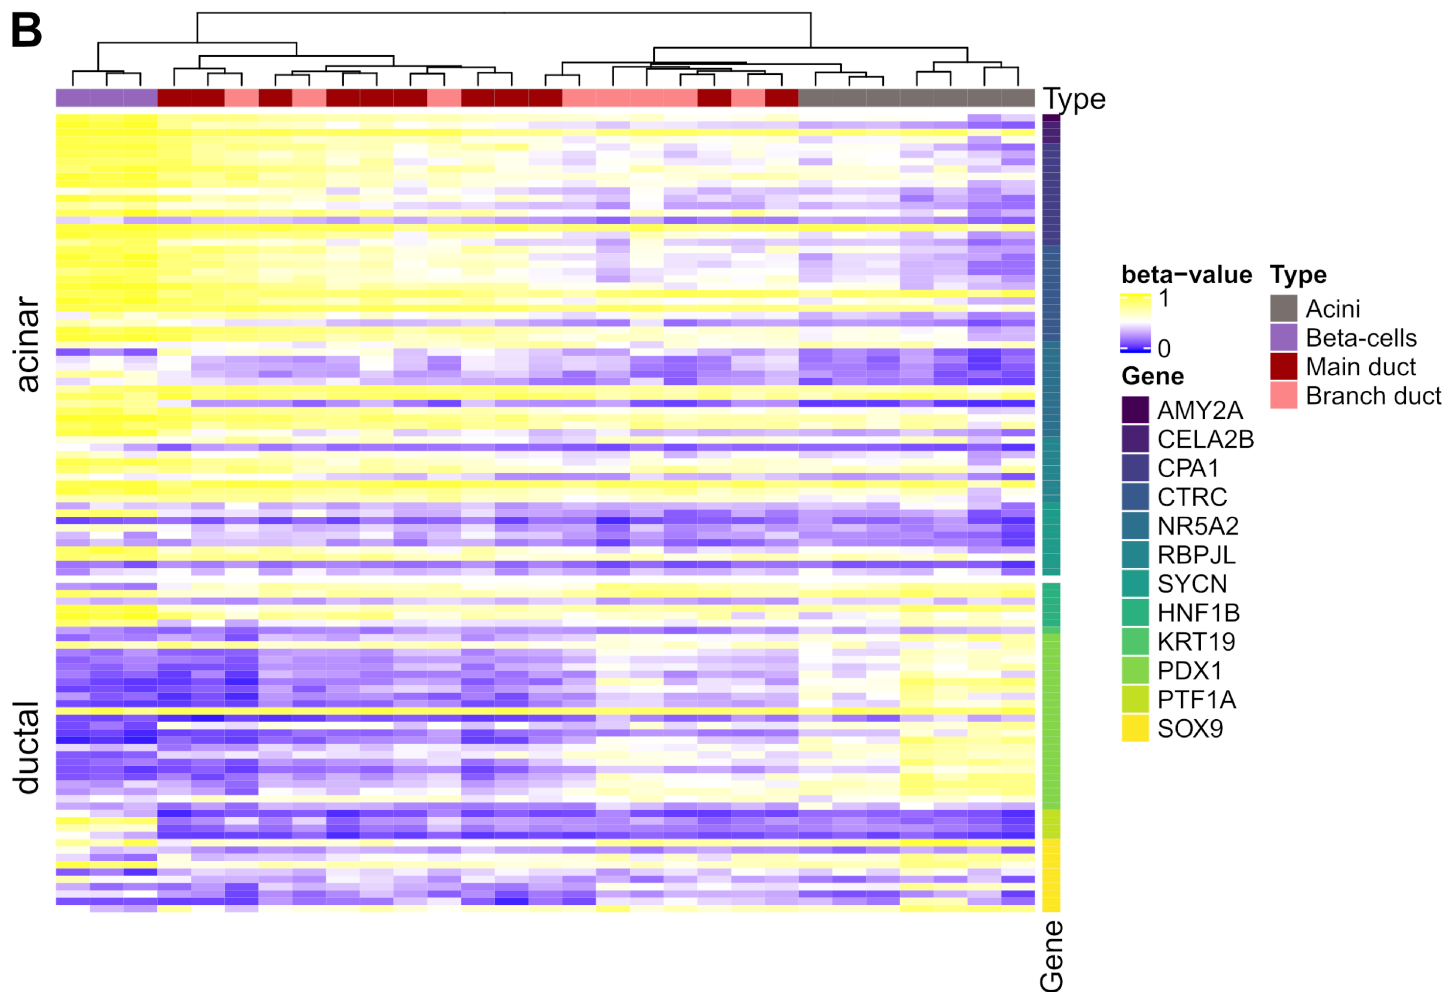

Supplement: inline-supplementary-material-6 [file inline-supplementary-material-6.pdf]

Layer

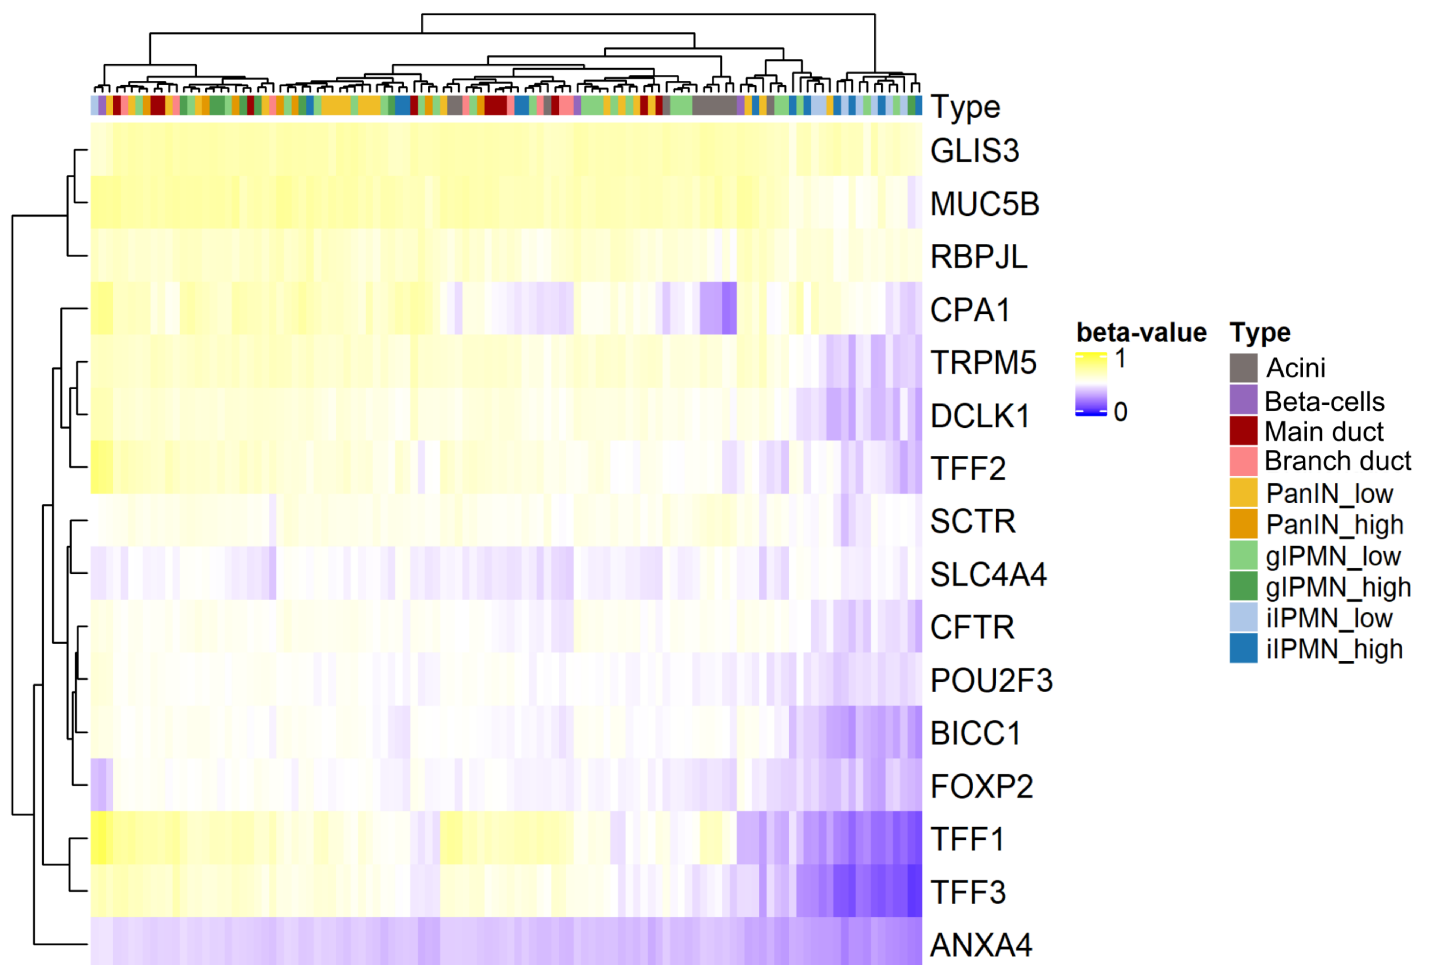

Supplement: inline-supplementary-material-7 [file inline-supplementary-material-7.pdf]

Suppl. Figure 7.tiff

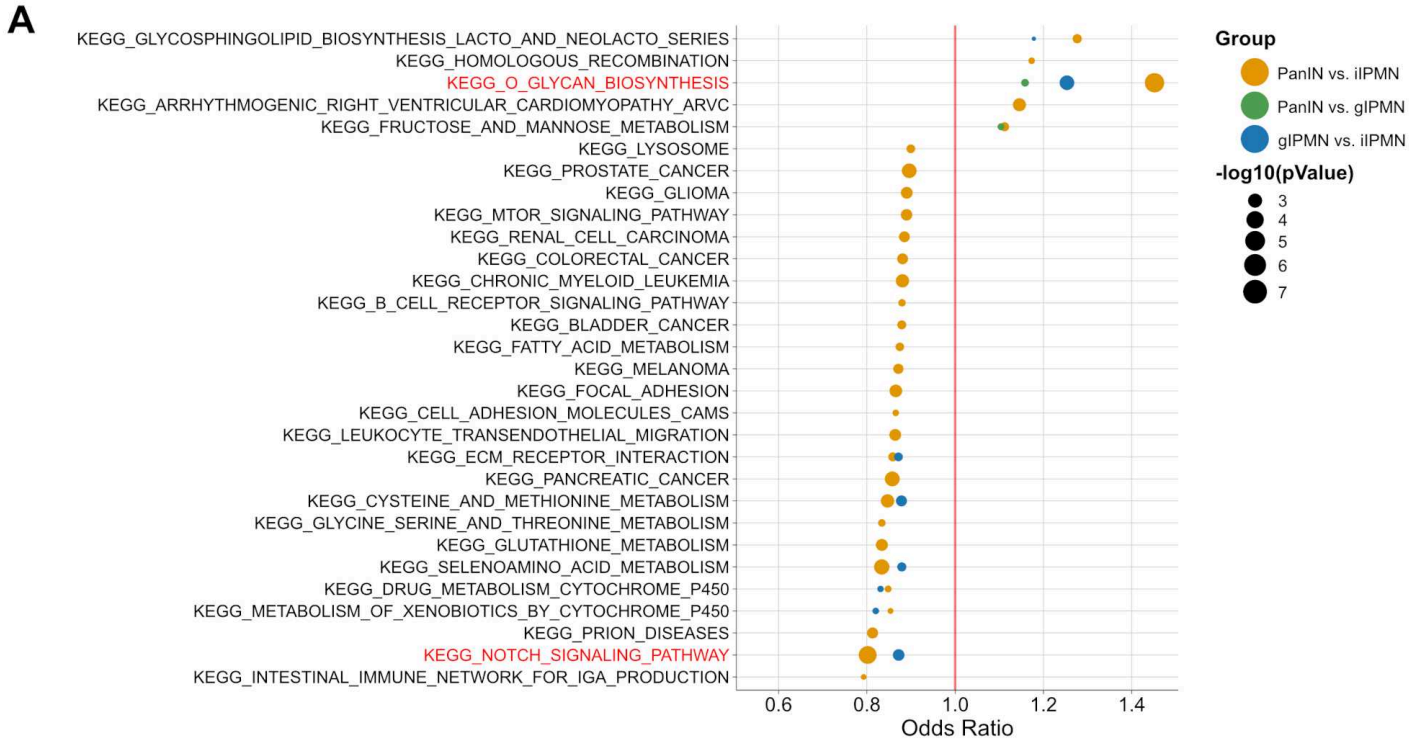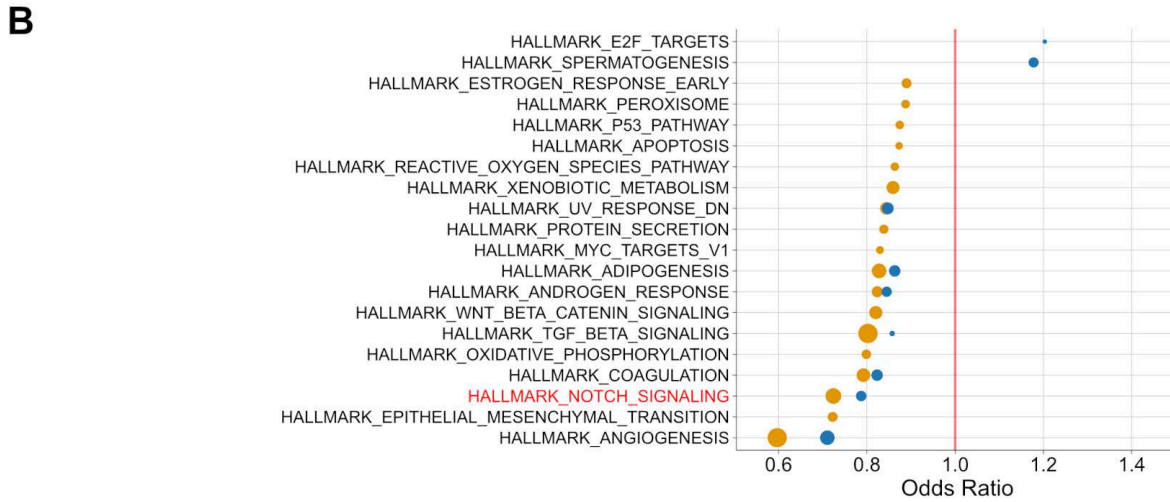

Supplement: inline-supplementary-material-8 [file inline-supplementary-material-8.pdf]
